## Integrating Phylogeny into Studies of C<sub>4</sub> Variation in the Grasses

Pascal-Antoine Christin\*, Nicolas Salamin, Elizabeth A. Kellogg, Alberto Vicentini, and Guillaume Besnard

Department of Ecology and Evolution, University of Lausanne, 1015 Lausanne, Switzerland (P.-A.C., N.S., G.B.); Swiss Institute of Bioinformatics, 1015 Lausanne, Switzerland (N.S.); Department of Biology, University of Missouri, St. Louis, Missouri 63121 (E.A.K.); and Center for Tropical Forest Science, Smithsonian Tropical Research Institute, Apartado Postal 0843–03092, Panama, Republic of Panama (A.V.)

C<sub>4</sub> photosynthesis consists of morphological and biochemical novelties that create a CO<sub>2</sub> pump that concentrates CO<sub>2</sub> around Rubisco (Kanai and Edwards, 1999), which decreases photorespiration and the resulting energy waste. Consequently, C<sub>4</sub> photosynthesis provides a competitive advantage in all conditions where photorespiration costs become important, especially at high temperatures and in arid and saline conditions (Sage, 2001). Despite being used by only 3% of extant angiosperm species (Sage, 2004), C<sub>4</sub> plants account for one-fifth of global terrestrial primary production (Ehleringer et al., 1997). This is mainly due to the high productivity of C<sub>4</sub> monocots, especially C<sub>4</sub> grasses, which are the most speciose C<sub>4</sub> group (Sage, 2004). The C<sub>4</sub> grasses dominate most open subtropical and tropical habitats, and some, such as maize (*Zea mays*), sorghum (*Sorghum bicolor*), millets (e.g. *Pennisetum glaucum*, *Setaria italica*), and sugarcane (*Saccharum officinarum*), are used as crops and have direct importance for human food consumption and/or as livestock fodder (Table I).

The biochemistry of the C<sub>4</sub> pathway has been an active field of research over the last 40 years and is thus well described (Kanai and Edwards, 1999). However, many issues regarding C<sub>4</sub> photosynthesis are still being investigated. A central problem has to do with the genetic regulation of C<sub>4</sub> photosynthesis. The genetic mechanisms responsible for the transition from C<sub>3</sub> to C<sub>4</sub> remain poorly understood, despite extensive investigation on the part of numerous scientists (e.g. Covshoff et al., 2008; Lara et al., 2008). The evolution of the C<sub>4</sub> pathway was previously thought to have involved relatively few key mutations (Ku et al., 1996), but recent studies showed that the C<sub>4</sub> pathway of maize involves cell-specific expression for 18% of the genes (Sawers et al., 2007) and requires deep synchronization between mesophyll (M) and bundle sheath (BS) cells (Bailey et al., 2007). These transcriptional changes are likely to mediate, at least in part, the variation observed in BS and M plastid proteomes

(Majeran et al., 2005, 2008). Rather than extensive changes in cis- and trans-acting regulatory elements, the segregation of enzymes between M and BS cells of C<sub>4</sub> plants could have been acquired through changes in key regulatory elements changing M and BS cellular environments (Covshoff et al., 2008), leading to important differences in their transcriptomes (Sawers et al., 2007). In addition to the C<sub>4</sub> enzymes, C<sub>4</sub> photosynthesis evolution necessitated rearrangements of chloroplast envelope proteins (Bräutigam et al., 2008). Furthermore, transport of C<sub>4</sub> intermediates between M and BS cells is probably not performed through simple diffusion, which suggests that other, unidentified, mechanisms exist (Sowinski et al., 2008), which may be yet another C<sub>4</sub>-specific adaptation.

Many of the enzymes that drive the carbon shuttle in C<sub>4</sub> plants are also present in C<sub>3</sub> plants but are involved in other aspects of plant growth and development (Monson, 2003). Tissue-specific regulation of C<sub>4</sub> pathway enzymes appears to have been a crucial step in the evolution of C<sub>4</sub> photosynthesis (Hibberd and Quick, 2002). One aspect of the pathway that remains poorly understood is the genetic components regulating the alteration of leaf anatomy (Kellogg, 1999). The developmental and genetic issues can be addressed with all C<sub>4</sub> species, but the low number of model species used to date limits the generalization of the results.

Grasses have been the focus of much of the recent C<sub>4</sub> research. For example, human-directed improvement of C<sub>3</sub> grass crops, such as rice (*Oryza sativa*), barley (*Hordeum vulgare*), and wheat (*Triticum aestivum*), by introgression of C<sub>4</sub> characteristics is receiving particular attention (Hibberd et al., 2008). Understanding the historical causes of C<sub>4</sub> evolutionary and ecological success is another area of intense research activity (Cerling et al., 1997; Beerling and Osborne, 2006; Osborne and Beerling, 2006; Osborne, 2008). The ecological importance of grasses made this family a natural study system for investigating factors affecting the distribution and success of C<sub>4</sub> plants (Taub, 2000; Carmo-Silva et al., 2007; Cabido et al., 2008; Edwards and Still, 2008). For instance, it has recently been shown that the oldest C<sub>4</sub> origin in grasses is relatively young (approximately 30 million years old), and correlates with a marked decrease of atmospheric CO<sub>2</sub> concentration (Christin et al., 2008; Vicentini et al., 2008). Since atmospheric CO<sub>2</sub> concentration and air

\* Corresponding author; e-mail pascal-antoine.christin@unil.ch.

The author responsible for distribution of materials integral to the findings presented in this article in accordance with the policy described in the Instructions for Authors ([www.plantphysiol.org](http://www.plantphysiol.org)) is: Pascal-Antoine Christin ([pascal-antoine.christin@unil.ch](mailto:pascal-antoine.christin@unil.ch)). [www.plantphysiol.org/cgi/doi/10.1104/pp.108.128553](http://www.plantphysiol.org/cgi/doi/10.1104/pp.108.128553)

**Table 1.** Characteristics of the C<sub>4</sub> grass lineagesNo., Lineage number; *n*, number of C<sub>4</sub> species. PCK, Phosphoenolpyruvate carboxykinase.

| No. <sup>a</sup>  | Name                                  | Age Estimates <sup>f</sup>                         | <i>n</i> | C <sub>3</sub> Sister Group                      | C <sub>4</sub> Subtype(s) | Crops <sup>m</sup>                | Habitat <sup>n</sup>            |
|-------------------|---------------------------------------|----------------------------------------------------|----------|--------------------------------------------------|---------------------------|-----------------------------------|---------------------------------|
| 1 <sup>b</sup>    | <i>Stipagrostis</i>                   | 15.1 (±4.6)–7.5 (±3.1)                             | 50       | <i>Sartidia</i> <sup>a</sup>                     | NADP-ME                   | –                                 | Deserts and semideserts         |
|                   |                                       | NA                                                 |          |                                                  |                           |                                   |                                 |
| 2 <sup>b</sup>    | <i>Aristida</i>                       | 28.8 (±5.2)–14.4 (±4.7)<br>[44.4 (±7.5)–present]   | 290      | <i>Sartidia</i> <sup>a</sup>                     | NADP-ME                   | –                                 | Large ecological range          |
| 3 <sup>b</sup>    | Core Chloridoideae                    | 32.0 (±4.4)–25.0 (±4.0)                            | 1,410    | <i>Merxmuellera range</i> <sup>a,g</sup>         | NAD-ME and PCK            | Finger millet, teff               | Large ecological range          |
|                   |                                       | [37.6 (±6.6)–22.5 (±5.7)]                          |          |                                                  |                           |                                   |                                 |
| 4 <sup>b</sup>    | <i>Centropodia</i>                    | 22.0 (±4.6)–11.3 (±5.5)                            | 4        | <i>M. range</i> <sup>a,g</sup>                   | NAD-ME                    | –                                 | Dry open habitats (semideserts) |
|                   |                                       | NA                                                 |          |                                                  |                           |                                   |                                 |
| 5 <sup>c</sup>    | <i>Eriachne</i>                       | 11.5 (±3.6)–6.6 (±2.8)                             | 40       | <i>Isachne</i> <sup>a,g,h</sup>                  | NADP-ME                   | –                                 | Warm open habitats (savannah)   |
|                   |                                       | NA                                                 |          |                                                  |                           |                                   |                                 |
| 6 <sup>b</sup>    | Arundinelleae                         | 26.4 (±4.4)–7.9 (±3.4)<br>[31.7 (±5.9)–present]    | 95       | Centothecae 2 <sup>a,g,h</sup>                   | NADP-ME                   | –                                 | Large ecological range          |
| 7 <sup>c,d</sup>  | <i>Panicum/Urochloa/Setaria</i> clade | 18.5 (±3.7)–16.4 (±3.6)                            | >530     | C <sub>3</sub> <i>Neurachne</i> <sup>a</sup>     | NADP-ME, NAD-ME, and PCK  | Foxtail, pearl, and proso millets | Large ecological range          |
|                   |                                       | [15.9 (±3.7)–13.1 (±3.2)]                          |          |                                                  |                           |                                   |                                 |
| 8 <sup>c</sup>    | <i>Neurachne munroi</i>               | 4.4 (±3.3)–present                                 | 1        | <i>Neurachne tenuifolia</i> <sup>a</sup>         | NADP-ME                   | –                                 | Dry open habitats (steppes)     |
|                   |                                       | NA                                                 |          |                                                  |                           |                                   |                                 |
| 9 <sup>c</sup>    | <i>Echinochloa</i>                    | 13.8 (±3.5)–4.4 (±2.8)                             | 30–40    | <i>Parodiophyllochloa</i> <sup>a,i</sup>         | NADP-ME                   | –                                 | Warm open habitats              |
|                   |                                       | [20.6 (±4.5)–2.6 (±1.3)]                           |          |                                                  |                           |                                   |                                 |
| 10 <sup>b</sup>   | <i>Alloteropsis</i>                   | 15.3 (±3.5)–present                                | 4–7      | Forest shade clade <sup>a,j</sup>                | NADP-ME and PCK           | –                                 | Warm open habitats (savannah)   |
|                   |                                       | NA                                                 |          |                                                  |                           |                                   |                                 |
| 11 <sup>c,d</sup> | <i>Digitaria</i>                      | 21.2 (±3.9)–8.1 (±3.4)                             | 220      | <i>x = 9 Paniceae</i> <sup>a</sup>               | NADP-ME                   | Fonio                             | Various warm open habitats      |
|                   |                                       | [15.9 (±3.7)–5.4 (±2)]                             |          |                                                  |                           |                                   |                                 |
| 12 <sup>b</sup>   | Andropogoneae                         | 21.9 (±3.9)–17.1 (±4.1)                            | 1,085    | <i>x = 10 Paniceae</i> <sup>a,k</sup>            | NADP-ME                   | Maize, sorghum, sugarcane         | Large ecological range          |
|                   |                                       | [24.3 (±4.9)–19.1 (±4.5)]                          |          |                                                  |                           |                                   |                                 |
| 13a <sup>b</sup>  | <i>Paspalum</i> clade                 | 14.1 (±3.4)–8.5 (±3.1)                             | >345     | <i>Streptostachys asperifolia</i> <sup>a,k</sup> | NADP-ME                   | Kodo millet                       | Warm open habitats (savannah)   |
|                   |                                       | [11.7 (±3.1)–present]                              |          |                                                  |                           |                                   |                                 |
| 13b <sup>c</sup>  | <i>Ophiochloa</i> clade               | 10.6 (±3.3)–2.8 (±1.9)<br>[13.7 (±3.5)–4.4 (±2.1)] | 115      | <i>S. asperifolia</i> <sup>a</sup>               | NADP-ME                   | –                                 | Large ecological range          |
| 14 <sup>b</sup>   | <i>Anthaenantia</i> <sup>e</sup>      | 14.3 (±3.5)–present                                | 1        | <i>Steinchisma</i> clade <sup>a,k</sup>          | NADP-ME                   | –                                 | Warm open habitats (savannah)   |
|                   |                                       | [15 (±3.7)–present]                                |          |                                                  |                           |                                   |                                 |
| 15 <sup>c</sup>   | <i>Streptostachys ramosa</i>          | 15.5 (±3.5)–present                                | 1        | <i>Cyphonanthus</i> <sup>l</sup>                 | NADP-ME                   | –                                 | Warm open habitats (savannah)   |
|                   |                                       | [16.3 (±3.7)–present]                              |          |                                                  |                           |                                   |                                 |
| 16 <sup>b</sup>   | <i>Panicum prionitis</i> clade        | 10.4 (±2.9)–6.3 (±2.7)                             | >5       | <i>Arthropogon lanceolatus</i> <sup>a,k</sup>    | NADP-ME                   | –                                 | Warm open habitats (savannah)   |
|                   |                                       | [11.2 (±2.9)–present]                              |          |                                                  |                           |                                   |                                 |
| 17 <sup>c</sup>   | <i>Mesosetum</i> clade                | 12.3 (±3.2)–11.3 (±3.0)                            | 40       | <i>Homolepis</i> <sup>a,k</sup>                  | NADP-ME                   | –                                 | Warm open habitats (savannah)   |
|                   |                                       | [14.8 (±3.5)–13.9 (±3.4)]                          |          |                                                  |                           |                                   |                                 |

<sup>a</sup>Christin et al. (2008). <sup>b</sup>Independent origin confirmed by PEPC analyses (Christin et al., 2007). <sup>c</sup>Independent origin based on putative species relationships only.<sup>d</sup>Phylogeny from Vicentini et al. (2008) found *Digitaria* and the main *x = 9 Paniceae* C<sub>4</sub> clade clustered together, suggesting a single C<sub>4</sub> origin. <sup>e</sup>Previously named *Leptocoryphium lanatum*. <sup>f</sup>Christin et al. (2008) and Vicentini et al. (2008) into square brackets, ages are given in millions of years. <sup>g</sup>Duvall et al. (2007). <sup>h</sup>Sánchez-Ken et al. (2007). <sup>i</sup>Morrone et al. (2008). <sup>j</sup>C<sub>3</sub> subspecies of *A. semialata* could represent a reversion from C<sub>4</sub> to C<sub>3</sub> (Ibrahim et al., 2009). <sup>k</sup>Vicentini et al. (2008). <sup>l</sup>Morrone et al. (2007). <sup>m</sup>Excluding fodders. <sup>n</sup>Watson and Dallwitz (1992).

temperature both affect  $C_4$  plant success, the current changes in global climate will potentially trigger important perturbations in major ecosystems, and could affect the performance of extensively cultivated tropical cereals. Therefore, a complete understanding of  $C_4$  ecology and physiology is necessary for conservation biology and agriculture to face future climate changes (Sage and Kubien, 2003; Ainsworth et al., 2008).

Comparative analyses offer an attractive approach for both the study of genetic determinants of  $C_4$  photosynthesis (Christin et al., 2007) and the identification of attributes associated with it (Edwards et al., 2007; Edwards and Still, 2008). Such an approach requires comparing several independent origins of  $C_4$  plants to determine characteristics that are shared among them. Indeed, if two  $C_4$  species inherited the  $C_4$  trait from their common ancestor, they do not represent independent replicates. Ideally, comparative studies should consist of distinct  $C_4$  clades, known to represent distinct origins of the  $C_4$  pathway, as well as  $C_3$  sister groups to each of the  $C_4$  lineages. For this approach to work, species relationships have to be assessed by phylogenetic analyses, rendering the phylogenetic framework of systematic botany useful to evolutionary and physiological investigations.

#### $C_4$ EVOLUTIONARY LINEAGES IN GRASSES

The grass family is composed of approximately 10,000 species, of which about 45% are  $C_4$  (Sage, 2004). Grass taxonomy recognizes between 12 and 13 main subfamilies but all  $C_4$  grasses belong to the PACMAD clade (Fig. 1; Duvall et al., 2007; or PACMAD, Sánchez-Ken et al., 2007). Both the distribution of  $C_4$  grasses in distinct taxonomic groups and the high variability of their  $C_4$  syndrome led to the inference of multiple origins of the  $C_4$  pathway in this family (Sinha and Kellogg, 1996; Kellogg, 2001). Phylogenetic analyses of the subfamily Panicoideae further suggested that  $C_4$  photosynthesis appeared several times independently, although a single appearance followed by multiple reversions could not be excluded (Giussani et al., 2001; Duvall et al., 2003; Vicentini et al., 2008). The ancestral state reconstructions adopted in these studies are strongly dependent on species sampling and rely on statistical methods whose assumptions can produce different results. In addition, the transition rate from  $C_3$  to  $C_4$  could also change through time (Vicentini et al., 2008), for instance as a function of atmospheric  $CO_2$  levels (Christin et al., 2008) or after the acquisition of preadaptations to  $C_4$  photosynthesis (Sage, 2001). Finally, inferences of characters that affect the rates of speciation or extinction can yield erroneous conclusions if not carefully considered (Goldberg and Igić, 2008).

Some studies have thus focused on the evolutionary dynamics of specific key enzymes involved in the  $C_4$  pathway, in particular phosphoenolpyruvate carboxylase (PEPC). The use of PEPC for the atmospheric

$CO_2$  fixation is one of the rare characteristics common to all  $C_4$  plants (Sinha and Kellogg, 1996; Sage, 2004), and its recruitment is an important step in the integration and optimization of  $C_4$  biochemistry (Svensson et al., 2003) and can be considered as a critical event in the evolution into a  $C_4$  plant. The presence of a Ser at position 780 of PEPC (numbered based on the maize sequence) is required for  $C_4$  function (Svensson et al., 2003) and was accompanied by many other recurrent adaptive amino acid changes (Christin et al., 2007) that left reliable  $C_4$ -specific genetic signatures. Because changes along a DNA sequence are amenable to statistical modeling, they can easily be traced on a PEPC phylogenetic tree. This technique was used to identify the grass lineages that likely evolved the  $C_4$  trait independently (Table I; Christin et al., 2007, 2008).

#### $C_4$ MODEL SPECIES IN GRASSES

The grasses contain few examples of closely related  $C_3/C_4$  pairs, and those that exist are not easily accessible. *Alloteropsis semialata* contains a  $C_3$  and a  $C_4$  subspecies, which are closely related (Ibrahim et al., 2009) but differ in chromosome number (Liebenberg and Fossey, 2001) and so are presumably intersterile. A recent phylogenetic study suggested that  $C_3$  subspecies of *A. semialata* could represent an evolutionary reversion from  $C_4$  to  $C_3$  photosynthesis (Ibrahim et al., 2009). The genus *Neurachne* includes both  $C_3$  and  $C_4$  species (Moore and Edwards, 1989); these are native to Australia and grow in relatively inaccessible parts of the continent and have not, to our knowledge, been cultivated. The  $C_3/C_4$  intermediate *Steinchisma hians* (formerly *Panicum milioides*) is sister to a group of  $C_3$  species, and has been crossed with them (Brown et al., 1985). *Steinchisma* as currently circumscribed is mainly South American.

Historically much of the work on  $C_4$  grasses focused on the genus *Panicum* because it appeared to have species with all possible photosynthetic pathways. Unfortunately, this genus was an assemblage of unrelated species (Aliscioni et al., 2003) whose taxonomy is being completely redefined (Morrone et al., 2007, 2008; Sede et al., 2008). The name *Panicum* should be restricted to a set of species that are all  $C_4$  with the subtype using the NAD-malic enzyme (NAD-ME), including switchgrass (*Panicum virgatum*).  $C_3$  species of *Panicum* are not closely related to true *Panicum* (Aliscioni et al., 2003).

Future  $C_4$  research should consider additional  $C_4$  species systems since including other independent lineages would increase the power of comparative analyses. In particular, *Aristida* and *Stipagrostis*, as well as the subfamily Chloridoideae, represent interesting  $C_4$  lineages. These groups are ecologically important (Table I) and strongly differ from the Panicoideae  $C_4$  species in terms of ecological attributes, such as aridity tolerance (Taub, 2000; Sato and Kubota, 2004; Carmo-Silva et al., 2007). They are species rich and widely

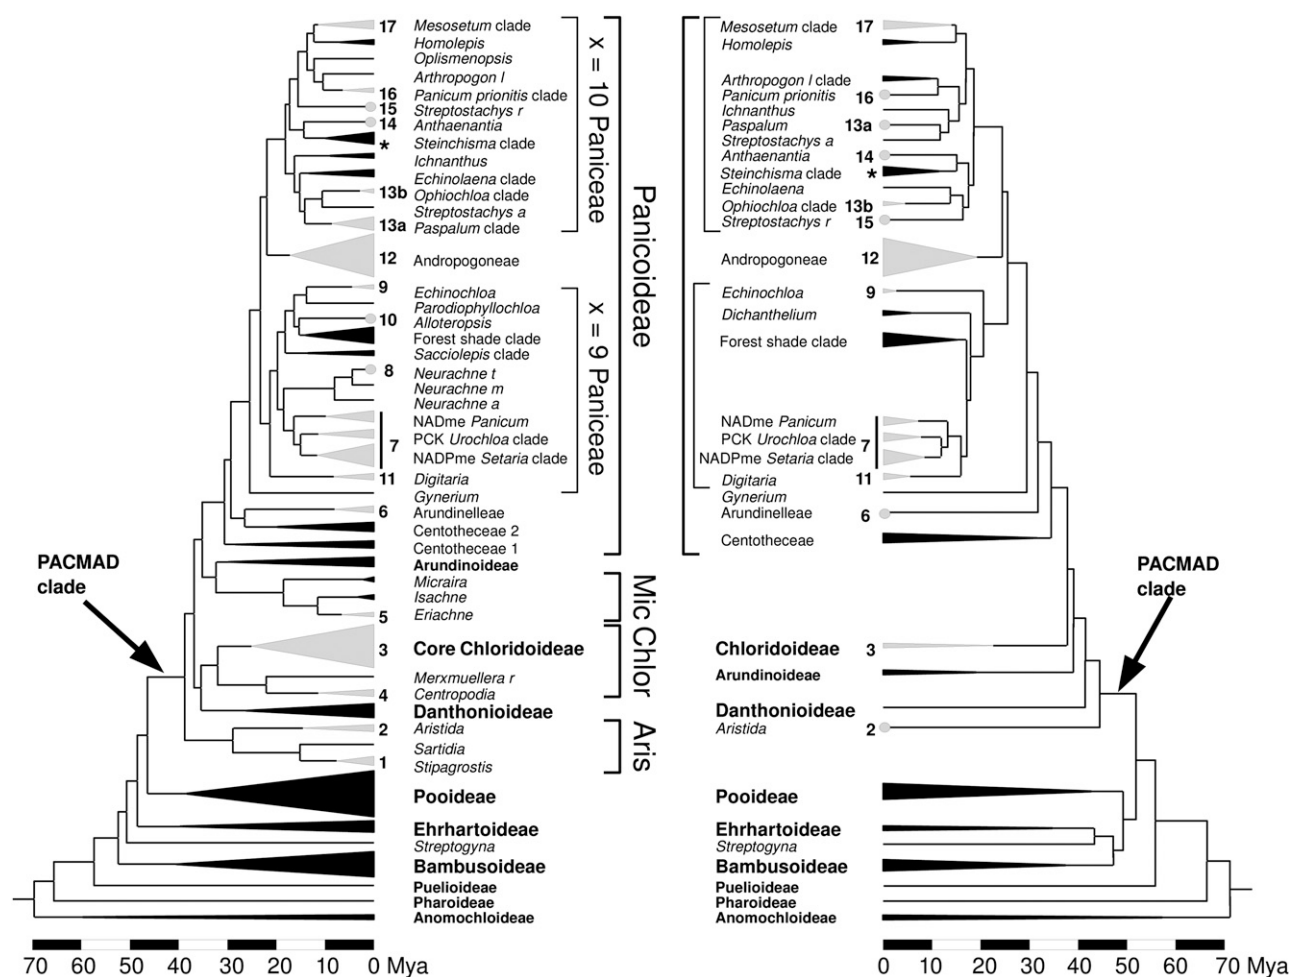

**Figure 1.** Calibrated phylogenetic trees of the grass family. Phylogenetic trees are from independent studies by Christin et al. (2008; on the left; based on plastid markers) and Vicentini et al. (2008; on the right; based on one plastid and one nuclear marker). Branch lengths are proportional to elapsed time, in million years (Mya). All clades containing only C<sub>3</sub> species are compressed (in black). Similarly, homogeneously C<sub>4</sub> lineages are also compressed but in gray. C<sub>4</sub> lineages represented by a single species are highlighted by a gray circle at the tip. C<sub>4</sub> lineages are numbered according to Christin et al. (2008). Clade names and subfamilies are indicated between the two topologies. Asterisks indicate the position of the C<sub>3</sub>/C<sub>4</sub> intermediate species *S. hiens*. Mic, Micrairoideae; Chlor, Chloridoideae; Aris, Aristidoideae; PACMAD clade, subfamilies Panicoideae, Arundinoideae, Chloridoideae, Micrairoideae, Aristidoideae, and Danthonioideae. x = 9 and x = 10 Paniceae identify two distinct groups of this tribe that differ according to their basic chromosome number (9 and 10, respectively; Giussani et al., 2001).

distributed, facilitating sampling for more detailed study.

## INTEGRATING PHYSIOLOGICAL STUDIES IN A PHYLOGENETIC CONTEXT

Understanding C<sub>4</sub>-specific growth, survival, and reproductive success, as well as the environmental conditions that influence these traits, is of prime ecological, agricultural, and evolutionary importance. Assessment of plant physiological traits, such as photosynthetic activity and efficiency, is time consuming, especially when performed under a range of environmental conditions. Therefore, physiological studies

typically consider only a limited number of species. Unfortunately, due to the strong variations of the C<sub>4</sub> pathway (Sinha and Kellogg, 1996), all C<sub>4</sub> plants are far from being equivalent. Species sampling for physiological investigations is crucial to ensure the generalization of conclusions. As noted above, taxa that inherited their C<sub>4</sub> trait from a common ancestor do not represent independent replicates. Their common ancestry can potentially lead to spurious correlations, which in turn can entangle characteristics due to the C<sub>4</sub> trait and those resulting from a close phylogenetic relationship (Taub, 2000). A sound phylogenetic framework showed that a low carbonic anhydrase activity, previously attributed to C<sub>4</sub> grasses (Gillon and Yakir, 2001), characterizes the whole PACMAD clade

and is not linked to the C<sub>4</sub> trait (Edwards et al., 2007). Thanks to its highly convergent nature, the C<sub>4</sub> trait is present in numerous natural replicates. Species sampling for C<sub>4</sub> physiological studies can take advantage of this by comparing species from independent C<sub>4</sub> lineages, as well as each C<sub>4</sub> clade with its C<sub>3</sub> sister group (Table I). Therefore, species relationships deduced from molecular markers should serve as a guide for species sampling.

As a C<sub>4</sub> study system, the grass family allows combining physiological, ecological, genomic, and evolutionary approaches, which are all necessary for a complete understanding of C<sub>4</sub> photosynthesis. Integration of the wide knowledge we are gaining about C<sub>4</sub> grasses to reach a full picture requires incorporation of evolutionary history by using phylogenetic information. Important efforts have led to a reasonably well-resolved phylogenetic tree for the grass family (e.g. Grass Phylogeny Working Group, 2001; Aliscioni et al., 2003; Duvall et al., 2007; Christin et al., 2008; Vicentini et al., 2008) but conflicts between plastid and nuclear markers (Fig. 1) still need to be resolved. Recent analyses of C<sub>4</sub> genes have identified grass lineages that evolved the C<sub>4</sub> pathway independently (Christin et al., 2007, 2008). These correspond to more than 15 independent replicates (Fig. 1), enabling wide-scale comparative studies to sort general attributes of C<sub>4</sub> plants as well as particular ones. By taking advantage of the convergent nature of C<sub>4</sub> photosynthesis, multidisciplinary studies in the grasses could bring a complete view of the selective pressures and genetic mechanisms responsible for the evolution of C<sub>4</sub> photosynthesis and the factors that control the current distribution and success of C<sub>4</sub> plants. C<sub>4</sub> photosynthesis in grasses could become a model of macroevolution process when completely elucidated, from the selective pressures to the genetic mechanisms that led to its appearances.

Received August 28, 2008; accepted October 30, 2008; published January 7, 2009.

## LITERATURE CITED

- Ainsworth EA, Rogers A, Leakey ADB (2008) Targets for crop biotechnology in a future high-CO<sub>2</sub> and high-O<sub>3</sub> world. *Plant Physiol* **147**: 13–19
- Aliscioni SS, Giussani LM, Zuloaga FO, Kellogg EA (2003) A molecular phylogeny of Panicum (Poaceae: Paniceae): tests of monophyly and phylogenetic placement within the Panicoideae. *Am J Bot* **90**: 796–821
- Bailey KJ, Gray JE, Walker RP, Leegood RC (2007) Coordinate regulation of phosphoenolpyruvate carboxylase and phosphoenolpyruvate carboxylase by light and CO<sub>2</sub> during C<sub>4</sub> photosynthesis. *Plant Physiol* **144**: 479–486
- Beerling DJ, Osborne CP (2006) The origin of the savanna biome. *Glob Change Biol* **12**: 2023–2031
- Bräutigam A, Hofmann-Benning S, Weber APM (2008) Comparative proteomics of chloroplasts envelopes from C<sub>3</sub> and C<sub>4</sub> plants reveals specific adaptations of the plastid envelope to C<sub>4</sub> photosynthesis and candidate proteins required for maintaining C<sub>4</sub> metabolite fluxes. *Plant Physiol* **148**: 568–579
- Brown RH, Bouton JH, Evans PT, Malter HE, Rigsby LL (1985) Photosynthesis, morphology, leaf anatomy, and cytogenetics of hybrids between C<sub>3</sub> and C<sub>3</sub>/C<sub>4</sub> *Panicum* species. *Plant Physiol* **77**: 653–658
- Cabido M, Pons E, Cantero JJ, Lewis JP, Anton A (2008) Photosynthetic pathway variation among C<sub>4</sub> grasses along a precipitation gradient in Argentina. *J Biogeogr* **35**: 131–140
- Carmo-Silva AE, Soares AS, Marques da Silva J, Bernardes da Silva A, Keys AJ, Arrabaça MC (2007) Photosynthetic responses of three C<sub>4</sub> grasses of different metabolic subtypes to water deficit. *Funct Plant Biol* **34**: 204–213
- Cerling TE, Harris JM, MacFadden BJ, Leakey MG, Quade J, Eisenmann V, Ehleringer JR (1997) Global vegetation change through the Miocene/Pliocene boundary. *Nature* **389**: 153–158
- Christin PA, Besnard G, Samaritani E, Duvall MR, Hodkinson TR, Savolainen V, Salamin N (2008) Oligocene CO<sub>2</sub> decline promoted C<sub>4</sub> photosynthesis in grasses. *Curr Biol* **18**: 37–43
- Christin PA, Salamin N, Savolainen V, Duvall MR, Besnard G (2007) C<sub>4</sub> photosynthesis evolved in grasses via parallel adaptive genetic changes. *Curr Biol* **17**: 1241–1247
- Covshoff S, Majeran W, Liu P, Kolkman JM, van Wijk KJ, Brutnell TP (2008) Dereglulation of maize C<sub>4</sub> photosynthetic development in a mesophyll cell-defective mutant. *Plant Physiol* **146**: 1469–1481
- Duvall MR, Davis JI, Clark LG, Noll JD, Goldman DH, Sánchez-Ken JG (2007) Phylogeny of the grasses (Poaceae) revisited. *Aliso* **23**: 237–247
- Duvall MR, Saar DE, Grayburn WS, Holbrook GP (2003) Complex transitions between C<sub>3</sub> and C<sub>4</sub> photosynthesis during the evolution of Paniceae: a phylogenetic case study emphasizing the position of *Steinchisma hians* (Poaceae), a C<sub>3</sub>-C<sub>4</sub> intermediate. *Int J Plant Sci* **164**: 949–958
- Edwards EJ, Still CJ (2008) Climate, phylogeny and the ecological distribution of C<sub>4</sub> grasses. *Ecol Lett* **11**: 266–276
- Edwards EJ, Still CJ, Donoghue MJ (2007) The relevance of phylogeny to studies of global change. *Trends Ecol Evol* **22**: 243–249
- Ehleringer JR, Cerling TE, Helliker BR (1997) C<sub>4</sub> photosynthesis, atmospheric CO<sub>2</sub>, and climate. *Oecologia* **112**: 285–299
- Gillon JS, Yakir D (2001) Influence of carbonic anhydrase activity in terrestrial vegetation on the <sup>18</sup>O content of atmospheric CO<sub>2</sub>. *Science* **291**: 2584–2587
- Giussani LM, Cota-Sanchez JH, Zuloaga FO, Kellogg EA (2001) A molecular phylogeny of the grass subfamily Panicoideae (Poaceae) shows multiple origins of C<sub>4</sub> photosynthesis. *Am J Bot* **88**: 1993–2012
- Goldberg EE, Igić B (2008) On phylogenetic tests of irreversible evolution. *Evolution Int J Org Evolution* **62**: 2727–2741
- Grass Phylogeny Working Group (2001) Phylogeny and subfamilial classification of the grasses (Poaceae). *Ann Mo Bot Gard* **88**: 373–457
- Hibberd JM, Quick WP (2002) Characteristics of C<sub>4</sub> photosynthesis in stems and petioles of C<sub>3</sub> flowering plants. *Nature* **415**: 451–454
- Hibberd JM, Sheehy JE, Langdale JA (2008) Using C<sub>4</sub> photosynthesis to increase the yield of rice: rationale and feasibility. *Curr Opin Plant Biol* **11**: 228–231
- Ibrahim DG, Burke T, Ripley BS, Osborne CP (2009) A molecular phylogeny of the genus *Allotetopsis* (Panicoideae, Poaceae) suggests an evolutionary reversion from C<sub>4</sub> to C<sub>3</sub> photosynthesis. *Ann Bot (Lond)* **103**: doi/10.1093/aob/mcn204
- Kanai R, Edwards GE (1999) The biochemistry of C<sub>4</sub> photosynthesis. In RF Sage, RK Monson, eds, *C<sub>4</sub> Plant Biology*. Academic Press, San Diego, pp 49–87
- Kellogg EA (1999) Phylogenetic aspects of the evolution of C<sub>4</sub> photosynthesis. In RF Sage, RK Monson, eds, *C<sub>4</sub> Plant Biology*. Academic Press, San Diego, pp 411–444
- Kellogg EA (2001) Evolutionary history of the grasses. *Plant Physiol* **125**: 1198–1205
- Ku MSB, Kano-Murakami Y, Matsuoka M (1996) Evolution and expression of C<sub>4</sub> photosynthesis genes. *Plant Physiol* **111**: 949–957
- Lara MV, Offermann S, Smith M, Okita TW, Andreo CS, Edwards GE (2008) Leaf development in the single-cell C<sub>4</sub> system in *Bienertia sinuspersici*: expression of genes and peptide levels for C<sub>4</sub> metabolism in relation to chlorenchyma structure under different light conditions. *Plant Physiol* **148**: 593–610
- Liebenberg EJJ, Fossey A (2001) Comparative cytogenetic investigation of the two subspecies of the grass *Allotetopsis semialata* (Poaceae). *Bot J Linn Soc* **137**: 243–248
- Majeran W, Cai Y, Sun Q, van Wijk KJ (2005) Functional differentiation of bundle sheath and mesophyll maize chloroplasts determined by comparative proteomics. *Plant Cell* **17**: 3111–3140
- Majeran W, Zybailov B, Ytterberg AJ, Dunsmore J, Sun Q, van Wijk KJ (2008) Consequences of C<sub>4</sub> differentiation for chloroplast membrane

- proteomes in maize mesophyll and bundle sheath cells. *Mol Cell Proteomics* **7**: 1609–1638
- Monson RK** (2003) Gene duplication, neofunctionalization, and the evolution of C<sub>4</sub> photosynthesis. *Int J Plant Sci* **164**: S43–S54
- Moore BD, Edwards GE** (1989) Metabolism of <sup>14</sup>CO<sub>2</sub> by leaves of different photosynthetic types of *Neurachne* species. *Plant Sci* **60**: 155–161
- Morrone O, Denham SS, Aliscioni SS, Zuloaga FO** (2008) *Parodiophyllochloa*, a new genus segregated from *Panicum* (Paniceae, Poaceae) based on morphological and molecular data. *Syst Bot* **33**: 66–76
- Morrone O, Scataglini MA, Zuloaga FO** (2007) *Cyphonanthus*, a new genus segregated from *Panicum* (Poaceae: Panicoideae: Paniceae) based on morphological, anatomical and molecular data. *Taxon* **56**: 521–532
- Osborne CP** (2008) Atmosphere, ecology and evolution: what drove the Miocene expansion of C<sub>4</sub> grasslands? *J Ecol* **96**: 35–45
- Osborne CP, Beerling DJ** (2006) Nature's green revolution: the remarkable evolutionary rise of C<sub>4</sub> plants. *Philos Trans R Soc Lond B Biol Sci* **361**: 173–194
- Sage RF** (2001) Environmental and evolutionary preconditions for the origin and diversification of the C<sub>4</sub> photosynthetic syndrome. *Plant Biol* **3**: 202–213
- Sage RF** (2004) The evolution of C<sub>4</sub> photosynthesis. *New Phytol* **161**: 341–370
- Sage RF, Kubien DS** (2003) Quo vadis C<sub>4</sub>? An ecophysiological perspective on global change and the future of C<sub>4</sub> plants. *Photosynth Res* **77**: 209–225
- Sánchez-Ken JG, Clark LG, Kellogg EA, Kay EE** (2007) Reinstatement and emendation of subfamily Micrairoideae (Poaceae). *Syst Bot* **32**: 71–80
- Sato A, Kubota F** (2004) Specific difference in photorespiration activity in C<sub>4</sub> subtype plants and its relationship with drought tolerance of leaf photosynthesis. *J Fac Agr Kyushu Univ* **49**: 25–32
- Sawers RJH, Liu P, Anufrikova K, Hwang JTG, Brutnell TP** (2007) A multi-treatment experimental system to examine photosynthetic differentiation in the maize leaf. *BMC Genomics* **8**: 12
- Sede SM, Morrone O, Giussani LM, Zuloaga FO** (2008) Phylogenetic studies in the Paniceae (Poaceae): a realignment of section *Lorea* of *Panicum*. *Syst Bot* **33**: 284–300
- Sinha NR, Kellogg EA** (1996) Parallelism and diversity in multiple origins of C<sub>4</sub> photosynthesis in the grass family. *Am J Bot* **83**: 1458–1470
- Sowinski P, Szczepanik J, Minchin PEH** (2008) On the mechanism of C<sub>4</sub> photosynthesis intermediate exchange between Kranz mesophyll and bundle sheath cells in grasses. *J Exp Bot* **59**: 1137–1147
- Svensson P, Bläsing OE, Westhoff P** (2003) Evolution of C<sub>4</sub> phosphoenolpyruvate carboxylase. *Arch Biochem Biophys* **414**: 180–188
- Taub DR** (2000) Climate and the US distribution of C<sub>4</sub> grass subfamilies and decarboxylation variants of C<sub>4</sub> photosynthesis. *Am J Bot* **87**: 1211–1215
- Vicentini A, Barber JC, Aliscioni SS, Giussani LM, Kellogg EA** (2008) The age of the grasses and clusters of origins of C<sub>4</sub> photosynthesis. *Glob Change Biol* **14**: 2963–2977
- Watson L, Dallwitz MJ** (1992) Grass genera of the world: descriptions, illustrations, identification, and information retrieval. CAB International. <http://biodiversity.uno.edu/delta/> (August 1, 2008)
